# Supplementary material for: Quantifying Retrogressive Thaw Slump Mass Wasting and Carbon Mobilisation on the Qinghai-Tibet Plateau Using Multi-Modal Remote Sensing
Source: Copernicus journal article supplement (doi:10.5194/egusphere-2025-2187), 2025-06-17
Supplement: Supplementary file 1 [file egusphere-2025-2187-supplement.pdf]

# Supplement to Maier et al.: „Quantifying Retrogressive Thaw Slump Mass Wasting and Carbon Mobilisation on the Qinghai-Tibet Plateau Using Multi-Modal Remote Sensing “

**Table S1:** Detailed results of RTS activity between 2011 and 2020 in QTP and its subregions. We report the median quantities per RTS including entire area  $A_{Xia}$ , actively eroding area  $\delta A$ , median and maximum (95<sup>th</sup> percentile) elevation change ( $\sim$  headwall height)  $\delta h$  and  $\delta h_{max}$ , and volume change of thawed material  $\delta V$ , as well as the total estimates as the sum over all RTS per region including volume change of thawed material  $\delta V$  (lower and upper bounds  $\delta V^{-/+}$ ).

| Region       | n           | Per RTS                                        |             |                   |                  |                                                 | Total                                           |              |               |
|--------------|-------------|------------------------------------------------|-------------|-------------------|------------------|-------------------------------------------------|-------------------------------------------------|--------------|---------------|
|              |             | $A_{Xia}$<br>[10 <sup>3</sup> m <sup>2</sup> ] | $\delta A$  | $\delta h$<br>[m] | $\delta h_{max}$ | $\delta V$<br>[10 <sup>3</sup> m <sup>3</sup> ] | $\delta V$<br>[10 <sup>6</sup> m <sup>3</sup> ] | $\delta V^-$ | $\delta V^+$  |
| West         | 170         | 4.45                                           | 2.75        | 1.65              | 4.80             | 5.74                                            | 1.60                                            | 0.10         | 12.09         |
| West-Central | 523         | 6.80                                           | 4.20        | 1.01              | 2.04             | 4.73                                            | 4.14                                            | 0.31         | 39.55         |
| Central      | 2688        | 8.70                                           | 5.80        | 1.22              | 2.32             | 6.89                                            | 39.28                                           | 5.56         | 178.52        |
| East         | 76          | 4.55                                           | 2.90        | 0.84              | 1.85             | 2.48                                            | 0.40                                            | 0.05         | 3.50          |
| Northeast    | 140         | 9.15                                           | 5.50        | 2.21              | 4.99             | 12.90                                           | 4.29                                            | 1.43         | 16.47         |
| <b>QTP</b>   | <b>3613</b> | <b>8.00</b>                                    | <b>5.20</b> | <b>1.21</b>       | <b>2.54</b>      | <b>6.33</b>                                     | <b>50.24</b>                                    | <b>7.46</b>  | <b>253.49</b> |

**Table S2:** Detailed results of RTS induced ground ice loss and OC mobilisation between 2011 and 2020 in QTP and its subregions. We report total ground ice loss  $\delta GI$  and its lower and upper bounds  $\delta GI^{-/+}$ , the total amount of SOC that has been mobilized due to RTS activity  $\delta OC$  including lower and upper bounds  $\delta OC^{-/+}$ , as well as the OC fluxes  $\delta OC_{flux}$  (lower and upper bounds  $\delta OC_{flux}^{-/+}$ ) that represent  $\delta OC$  normalized by the number of years of the temporal baseline of the DEM.

| Region       | $\delta GI$                       | $\delta GI^-$ | $\delta GI^+$ | $\delta OC$            | $\delta OC^-$ | $\delta OC^+$ | $\delta OC_{flux}$                      | $\delta OC_{flux}^-$ | $\delta OC_{flux}^+$ |
|--------------|-----------------------------------|---------------|---------------|------------------------|---------------|---------------|-----------------------------------------|----------------------|----------------------|
|              | [10 <sup>5</sup> m <sup>3</sup> ] |               |               | [10 <sup>7</sup> kg C] |               |               | [10 <sup>6</sup> kg C a <sup>-1</sup> ] |                      |                      |
| West         | 0.64                              | 0.04          | 6.15          | 0.35                   | 0.00          | 1.70          | 0.42                                    | 0.00                 | 2.09                 |
| West-Central | 1.96                              | 0.12          | 32.28         | 1.76                   | 0.00          | 7.35          | 2.27                                    | 0.00                 | 9.43                 |
| Central      | 31.94                             | 2.29          | 232.85        | 22.63                  | 0.41          | 62.57         | 28.58                                   | 0.52                 | 79.13                |
| East         | 0.19                              | <0.01         | 4.37          | 0.54                   | <0.01         | 1.87          | 0.67                                    | <0.01                | 2.31                 |
| Northeast    | 1.05                              | 0.32          | 4.26          | 2.26                   | 0.69          | 5.27          | 3.05                                    | 0.95                 | 7.04                 |
| <b>QTP</b>   | <b>35.81</b>                      | <b>2.80</b>   | <b>281.99</b> | <b>27.83</b>           | <b>1.11</b>   | <b>79.80</b>  | <b>35.34</b>                            | <b>1.47</b>          | <b>101.28</b>        |

**Table S3:** Validation of the planimetric area and material erosion volume estimated based on RTS delineations of Xia et al. (2024) from summer 2018, 2019, and 2020 and the elevation change between TanDEM-X DEM from winter 2011 and 2019. We report the estimated actively eroding area estimated from the inventory overlapping only negative elevation change  $\delta A$  for 2018, 2019 and 2020 as well as the volume change of the eroded material  $\delta V$  (including the propagated height error  $\sigma_v$ ). The validation  $\delta A$  and  $\delta V$  values come from a manual delineation of the negative elevation change for 307 RTS in five test sites distributed across the subregions in QTP.

| Test site             | val.         | $\delta A [10^5 \text{ m}^2]$ |              |              | val.                                | $\delta V \pm \sigma_v [10^5 \text{ m}^3]$ |                                     |                                      |
|-----------------------|--------------|-------------------------------|--------------|--------------|-------------------------------------|--------------------------------------------|-------------------------------------|--------------------------------------|
|                       |              | 2018                          | 2019         | 2020         |                                     | 2018                                       | 2019                                | 2020                                 |
| A Western Kunlun      | 2.20         | 4.75                          | 5.00         | 5.37         | $9.19 \pm 1.59$                     | $10.42 \pm 3.97$                           | $11.01 \pm 4.19$                    | $11.83 \pm 4.43$                     |
| B Gaize               | 0.23         | 0.22                          | 0.25         | 0.27         | $0.44 \pm 0.13$                     | $0.38 \pm 0.15$                            | $0.43 \pm 0.16$                     | $0.46 \pm 0.16$                      |
| C Southern Nima       | 2.14         | 2.18                          | 2.30         | 2.39         | $3.70 \pm 0.40$                     | $3.30 \pm 0.40$                            | $3.46 \pm 0.41$                     | $3.57 \pm 0.42$                      |
| D Beiluhe River Basin | 36.04        | 33.74                         | 41.80        | 49.20        | $78.58 \pm 8.10$                    | $62.58 \pm 8.46$                           | $76.09 \pm 9.77$                    | $84.65 \pm 10.52$                    |
| E Qilian Mountain     | 1.68         | 2.84                          | 3.31         | 3.54         | $7.48 \pm 1.63$                     | $7.99 \pm 2.58$                            | $8.83 \pm 3.04$                     | $9.19 \pm 3.08$                      |
| <b>All test sites</b> | <b>42.28</b> | <b>43.72</b>                  | <b>52.65</b> | <b>60.77</b> | <b><math>99.39 \pm 11.84</math></b> | <b><math>84.66 \pm 15.55</math></b>        | <b><math>99.81 \pm 17.56</math></b> | <b><math>109.69 \pm 18.61</math></b> |

**Table S4:** Comparison between VHR DEM based on drone photogrammetric survey in summer 2020 at 6 RTS in the Beiluhe River Basin in central QTP and the elevation change computed from the boundaries of the optical RTS inventory (Xia et al. 2024) and the TanDEM-X DEM (2011-2019). The median headwall height is a direct measurement differences of elevations from stable terrain above the headwall and elevations from the slump floor close to the headwall in the VHR DEM and indirectly computed for the TanDEM-X elevation change by dividing the volume change of the eroded material  $\delta V$  by the erosion affected area  $\delta A$ . The maximum elevation change within the actively eroding area of the RTS gives an indication of the potential headwall height and is used for the comparison to the VHR DEM. For all values, we report the standard deviation / error estimate  $\sigma$ .

| RTS | Location                | Initiation | RTS area                |            | VHR<br>$\bar{h}$ [m] | TanDEM-X<br>$\delta h_{\max}$ [m] |
|-----|-------------------------|------------|-------------------------|------------|----------------------|-----------------------------------|
|     |                         |            | Total [m <sup>2</sup> ] | Active [%] |                      |                                   |
| 1   | 34.647° N,<br>92.936° E | 2017       | 7265                    | 77         | $2.76 \pm 1.19$      | $3.04 \pm 1.91$                   |
| 2   | 34.731° N,<br>92.871° E | 2017       | 9141                    | 78         | $3.08 \pm 1.06$      | $3.78 \pm 2.57$                   |
| 3   | 34.710° N,<br>92.887° E | 2017       | 2536                    | 81         | $1.10 \pm 0.83$      | $2.93 \pm 1.85$                   |
| 4   | 34.708° N,<br>92.883° E | 2017       | 9637                    | 53         | $3.55 \pm 0.75$      | $3.83 \pm 2.78$                   |
| 5   | 34.647° N,<br>92.928° E | 2019       | 3891                    | 69         | $1.99 \pm 1.99$      | $3.32 \pm 2.46$                   |
| 6   | 34.646° N,<br>92.926° E | 2019       | 1087                    | 100        | $1.89 \pm 0.98$      | $1.83 \pm 1.56$                   |

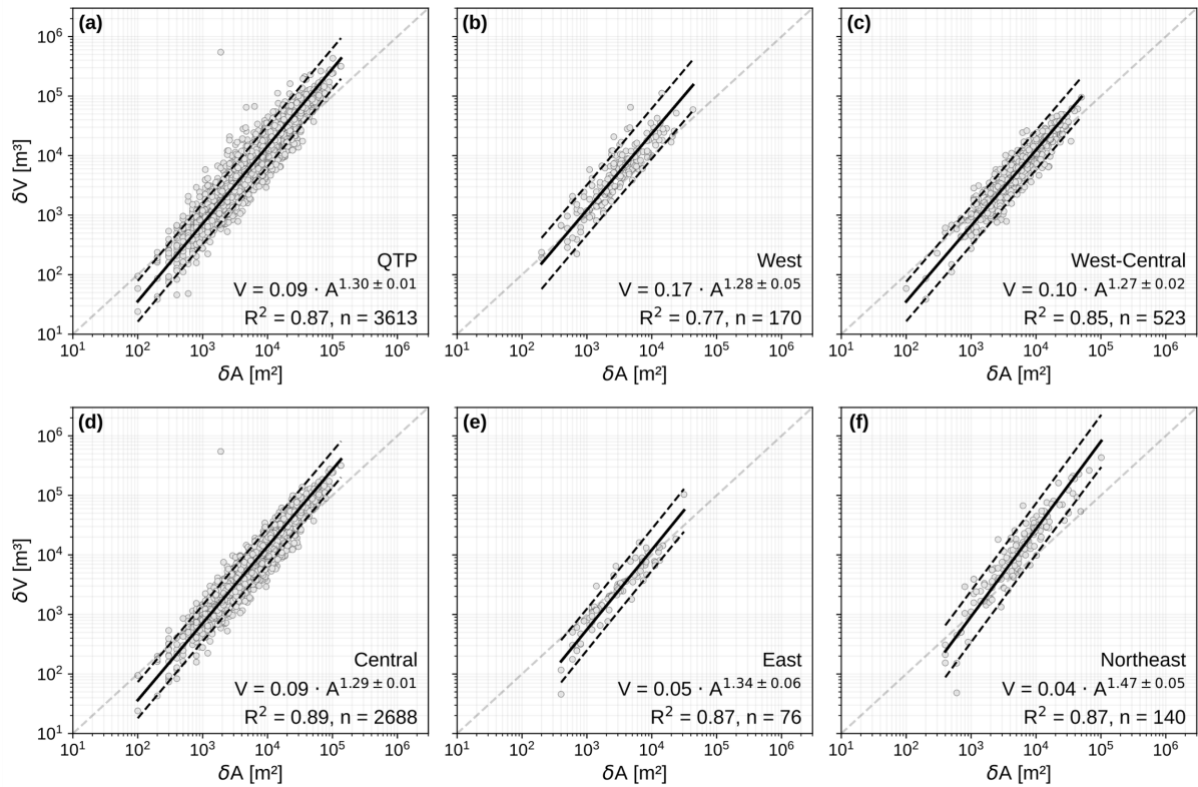

**Figure S1:** Allometric scaling between the actively eroding area of the delineated scar zone  $\delta A$  of the optical RTS inventory and the computed volume change based on the elevation change of the TanDEM-X DEM (T2-T1) within the actively eroding area. **(a)** For the entire QTP with  $n_{\text{RTS}} = 3613$ , we found a scaling coefficient  $\alpha = 1.30 \pm 0.01$  with  $R^2 = 0.87$ . **(b) – (f)** For the QTP subregions, we found  $\alpha$ -values between 1.27 and 1.47 with  $R^2$ -values between 0.77 and 0.89.

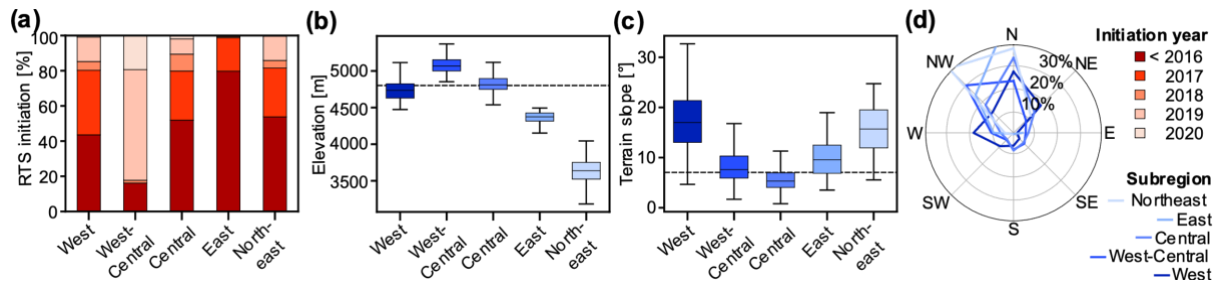

**Figure S2:** Temporal and terrain characteristics of RTS present in the optical inventory of Xia et al. (2024) in the subregions of QTP. **(a)** Percentage of RTS per initiation year. **(b)** Distribution of elevation of the RTS location. **(c)** Distribution of the slope of the average terrain at the RTS location. **(d)** Main terrain aspect of RTS.

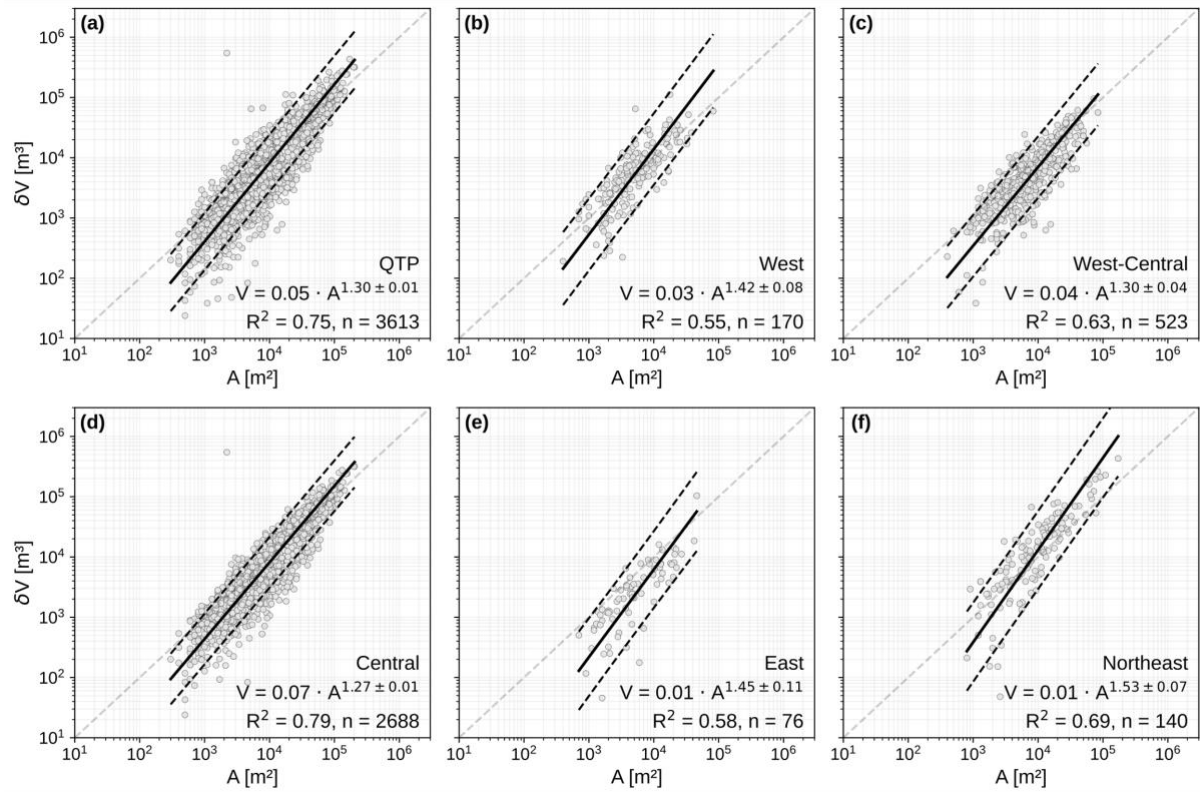

**Figure S3:** Allometric scaling between the entire area of the delineated scar zone  $A_{Xia}$  of the optical RTS inventory and the computed volume change based on the elevation change of the TanDEM-X DEM (T2-T1) within the actively eroding area. **(a)** For the entire QTP with  $n_{RTS} = 3613$ , we found a scaling coefficient  $\alpha = 1.30 \pm 0.01$  with  $R^2 = 0.75$ . **(b) – (f)** For the QTP subregions, we found  $\alpha$ -values between 1.27 and 1.30 in the QTP's central regions and higher  $\alpha$ -values between 1.42 and 1.53 in the west, east and northeast of the plateau with subregion  $R^2$ -values between 0.55 in the West and 0.79 in Central QTP.
